# Supplementary material
Source: MDPI journal article supplement (https://www.mdpi.com/2073-4344/12/12/1510)
Supplement: s1 [file s1]

# **Photocatalytic Transformations of the Resveratrol Derivative in Microflow Reactor**

**Milena Mlakić <sup>1</sup>, Anabela Ljubić <sup>2</sup>, Anita Šalić <sup>3,\*</sup>, Bruno Zelić <sup>4,5</sup>, Ottó Horváth <sup>6</sup>,  
Valentina Milašinović <sup>7</sup>, Martin Gojun <sup>4</sup>, Krešimir Molčanov <sup>7</sup> and Irena Škorić <sup>1,\*</sup>**

<sup>1</sup>Department of Organic Chemistry, Faculty of Chemical Engineering and Technology, University of Zagreb,  
Marulićev trg 19, HR-10000 Zagreb, Croatia

<sup>2</sup>Pliva R&D, Teva Pharmaceutical Industries Ltd, Prilaz baruna Filipovića 29, HR-10 000 Zagreb, Croatia

<sup>3</sup>Department of Thermodynamics, Mechanical Engineering and Energy, Faculty of Chemical Engineering and  
Technology, University of Zagreb, Marulićev trg 19, HR-10000 Zagreb, Croatia

<sup>4</sup>Department of Reaction Engineering and Catalysis, Faculty of Chemical Engineering and Technology,  
University of Zagreb, Marulićev trg 19, HR-10000 Zagreb, Croatia

<sup>5</sup>Department of Packaging, Recycling and Environmental protection, University North, Trg dr. Žarka Dolinara 1,  
HR-48 000 Koprivnica, Croatia

<sup>6</sup>Department of General and Inorganic Chemistry, Center for Natural Sciences, Faculty of Engineering,  
University of Pannonia, P.O.B. 1158, H-8210 Veszprém, Hungary

<sup>7</sup>Division of Physical Chemistry, Rudjer Bošković Institute, Bijenička cesta 54, HR-10000 Zagreb, Croatia

\*Correspondence: asalic@fkit.hr (A.Š.); iskoric@fkit.hr (I.Š.); Tel.: +385-1-4597-101 (A.Š.); +385-1-4597-241 (I.Š.)

## **Content:**

1. NMR spectra of the compounds *trans*-**1**, *cis*-**1** and **2-4** (Figs S2-S12)
2. HRMS analyses (Figs S13-S16)

## 1. NMR spectra of pure compounds

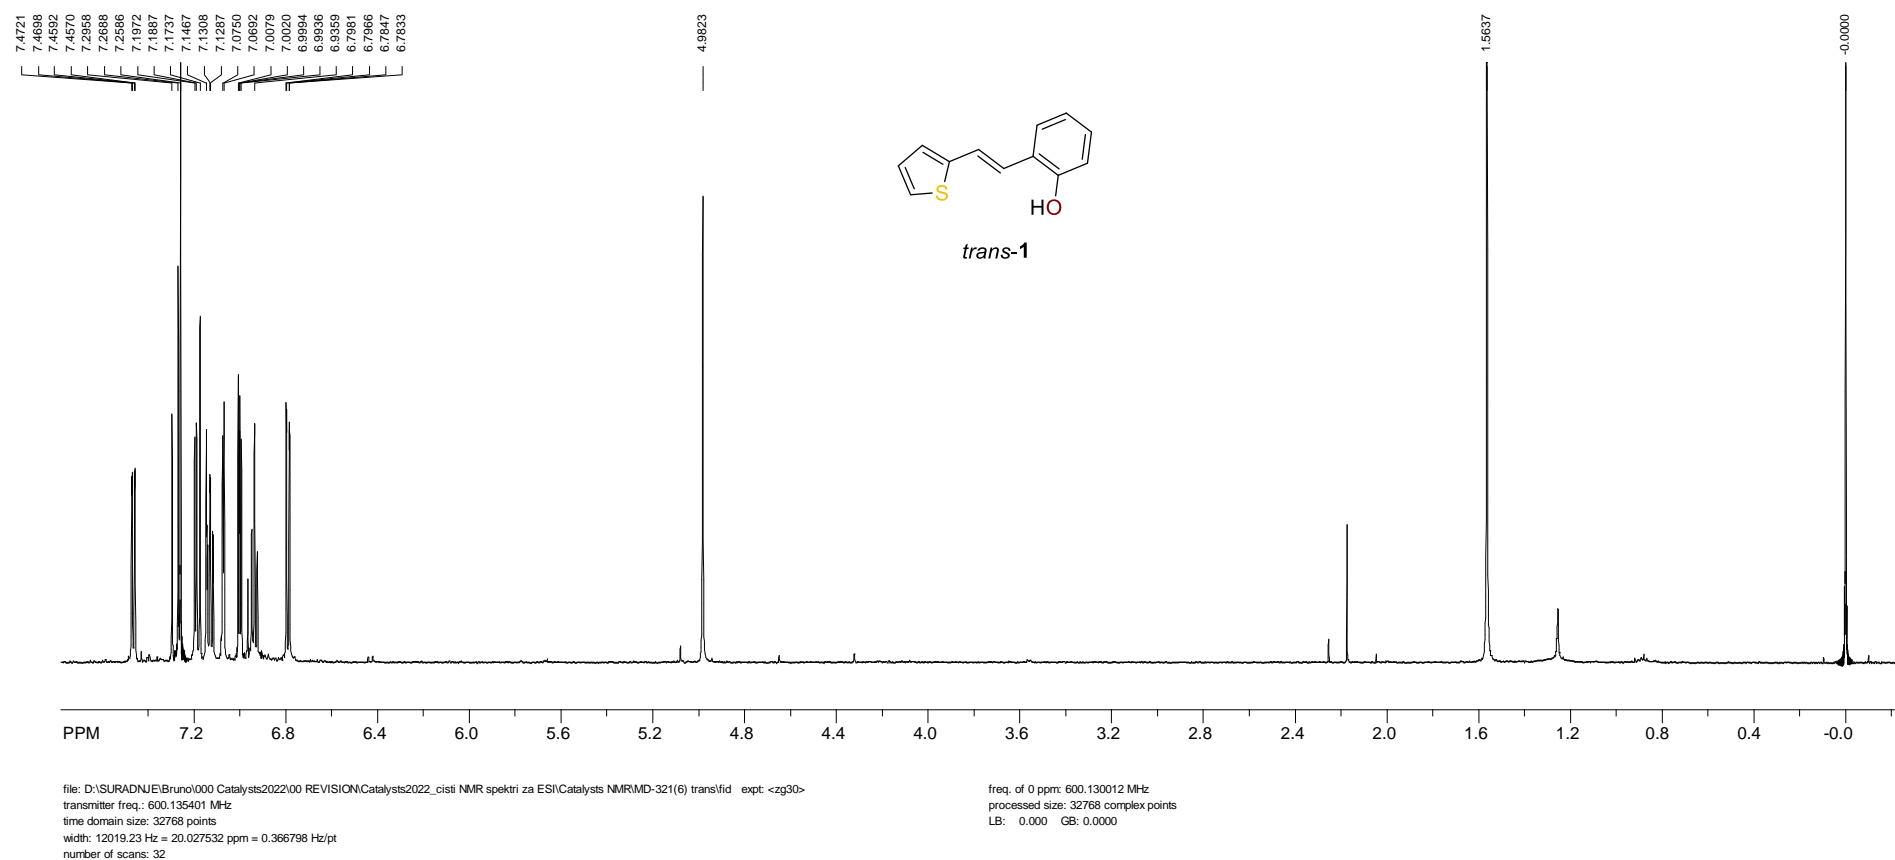

**Figure S1.**  $^1\text{H}$  NMR spectrum ( $\text{CDCl}_3$ ) of (*E*)-2-(2-(thiophen-2-yl)vinyl)phenol (*trans*-1).



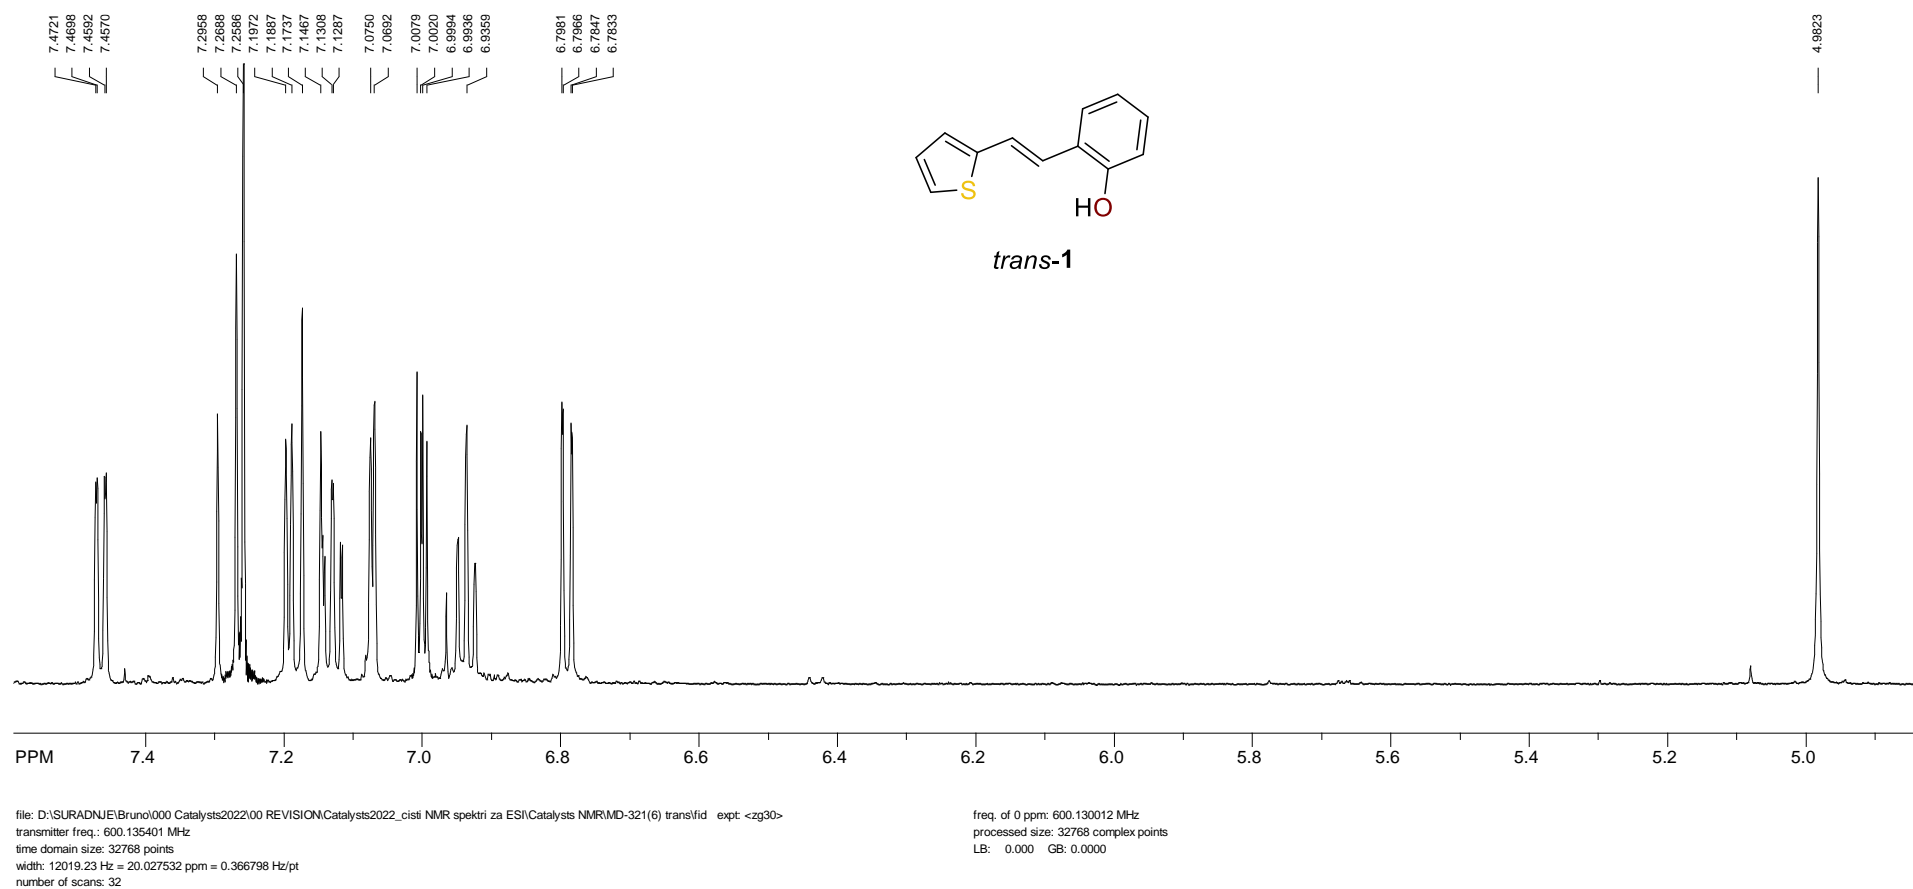

**Figure S2.** Part of the  $^1\text{H}$  NMR spectrum ( $\text{CDCl}_3$ ) of (*E*)-2-(2-(thiophen-2-yl)vinyl)phenol (*trans*-1).

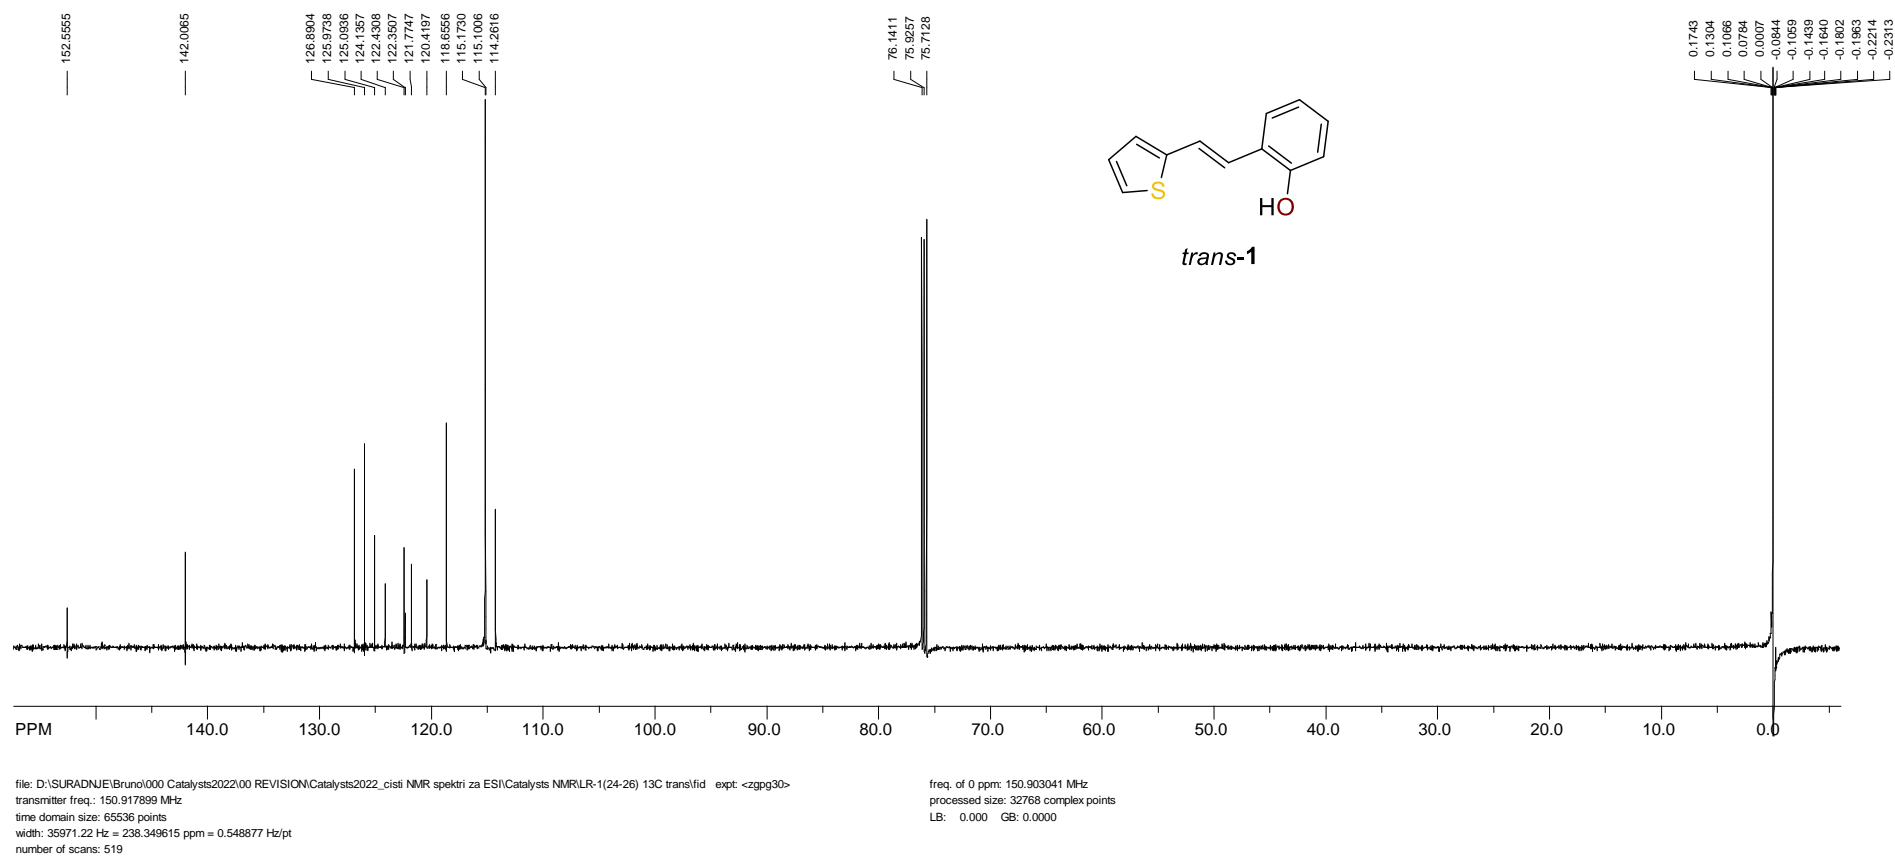

**Figure S3.** <sup>13</sup>C NMR spectrum (CDCl<sub>3</sub>) of (*E*)-2-(2-(thiophen-2-yl)vinyl)phenol (*trans*-1).

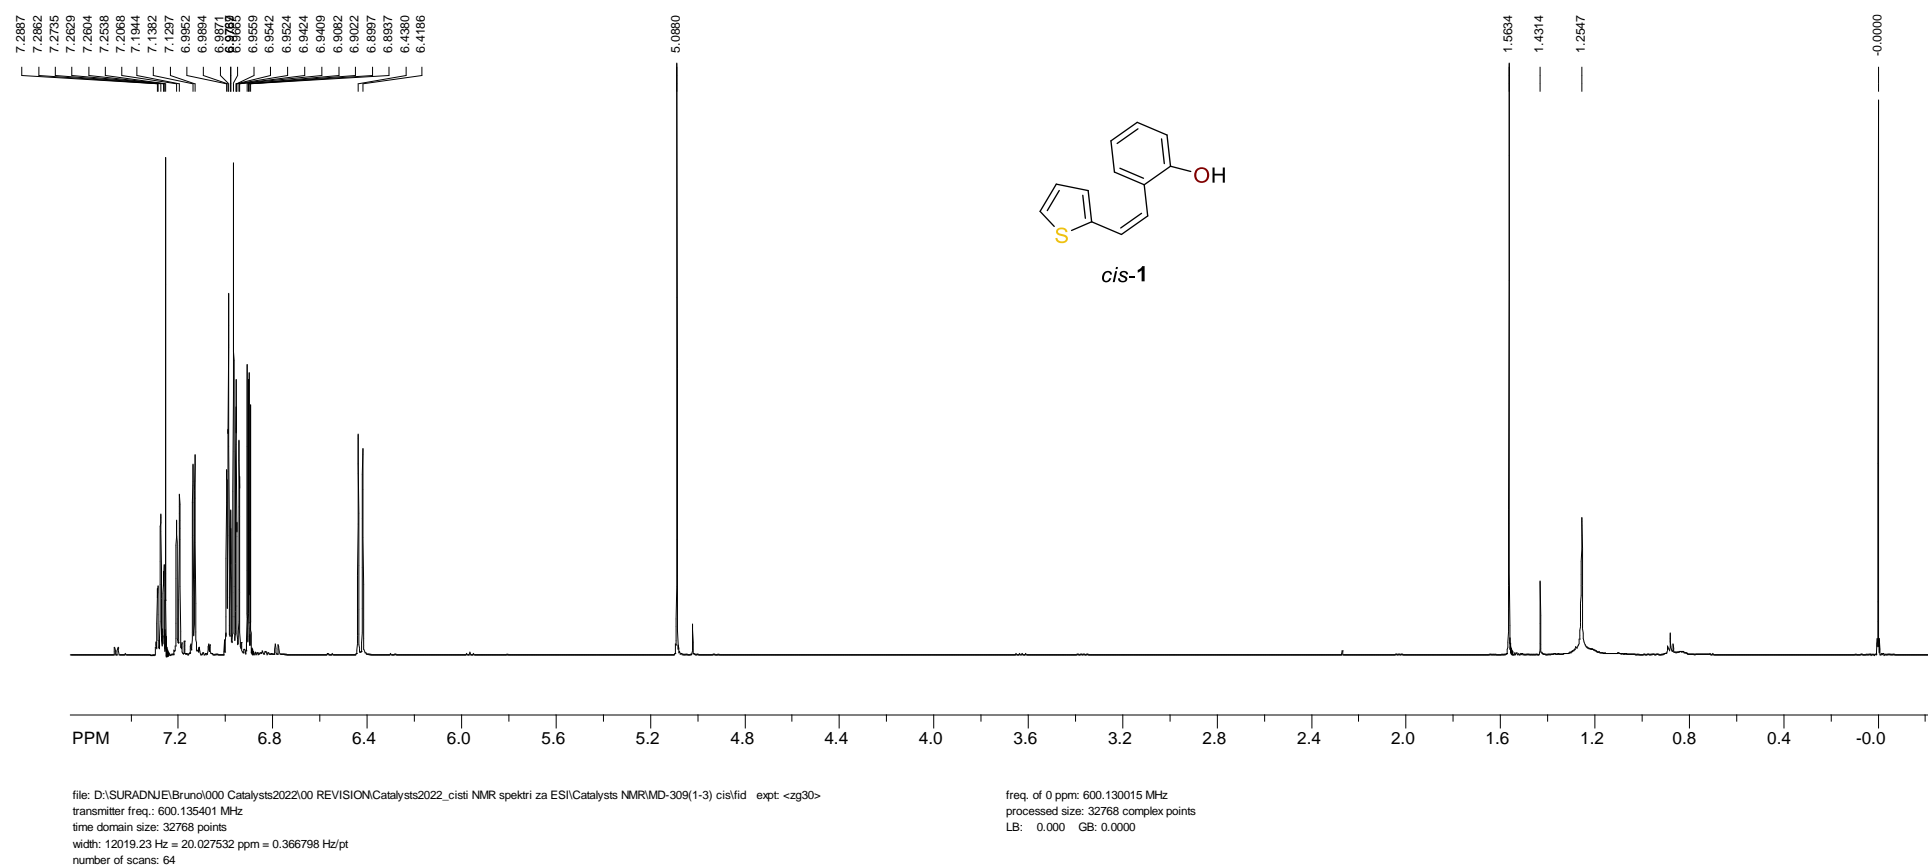

**Figure S4.**  $^1\text{H}$  NMR spectrum ( $\text{CDCl}_3$ ) of (Z)-2-(2-(thiophen-2-yl)vinyl)phenol (*cis-1*).

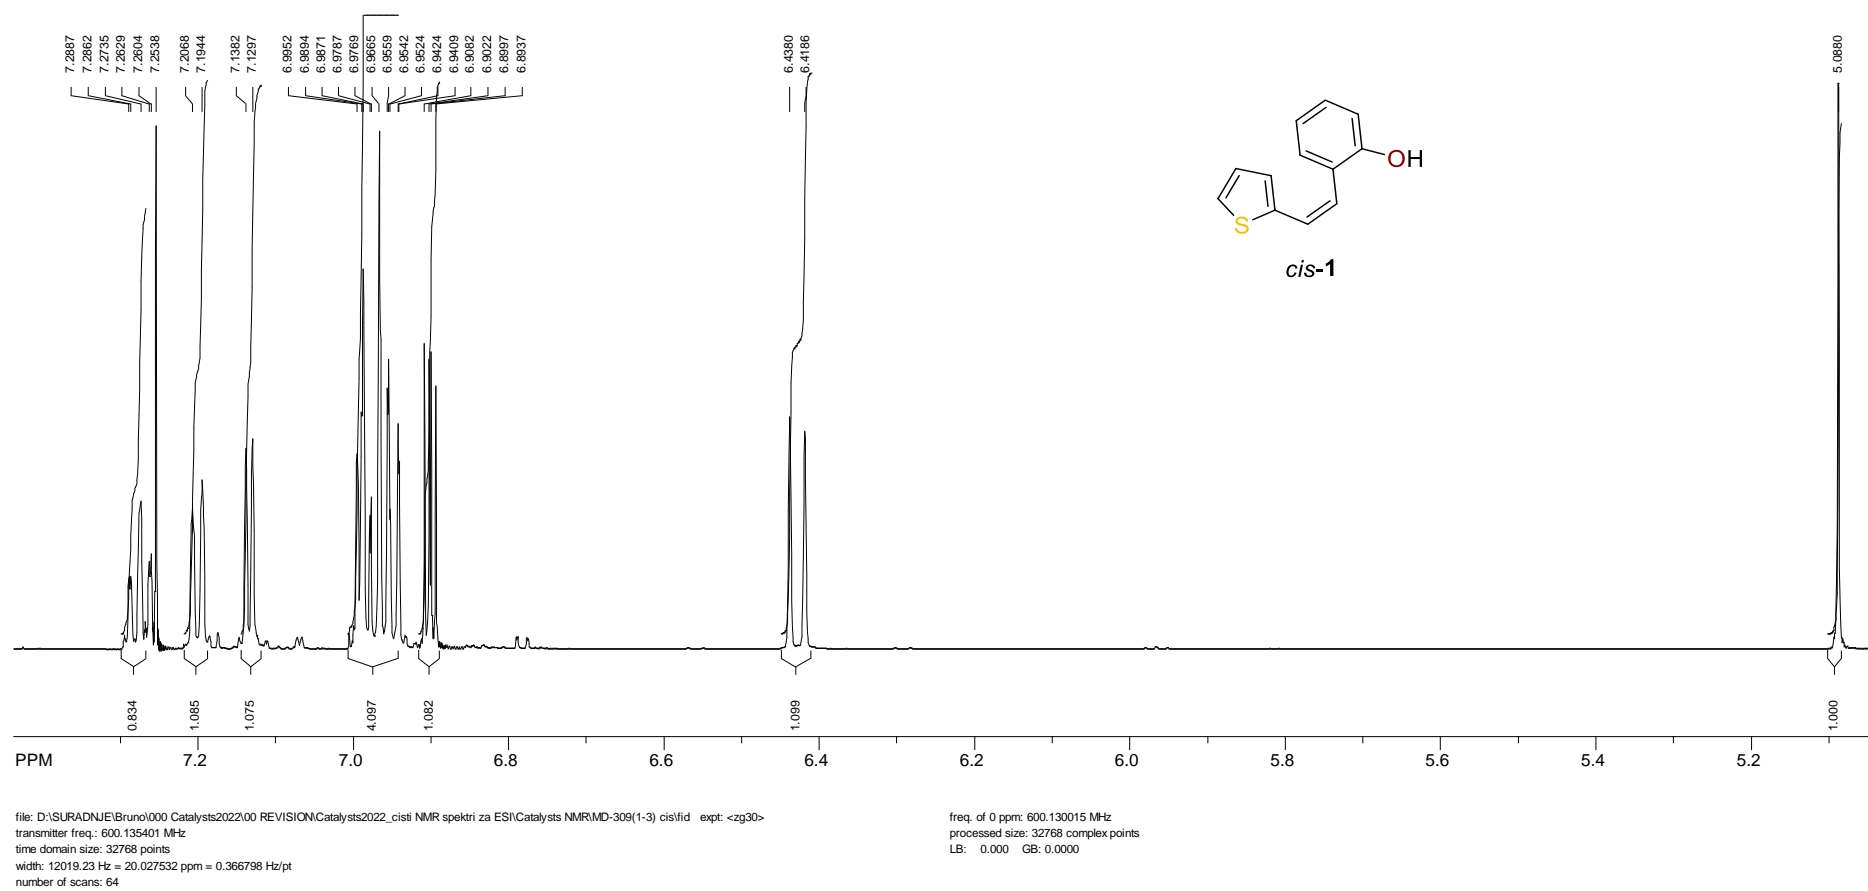

**Figure S5.** Part of the <sup>1</sup>H NMR spectrum (CDCl<sub>3</sub>) of (Z)-2-(2-(thiophen-2-yl)vinyl)phenol (*cis-1*).





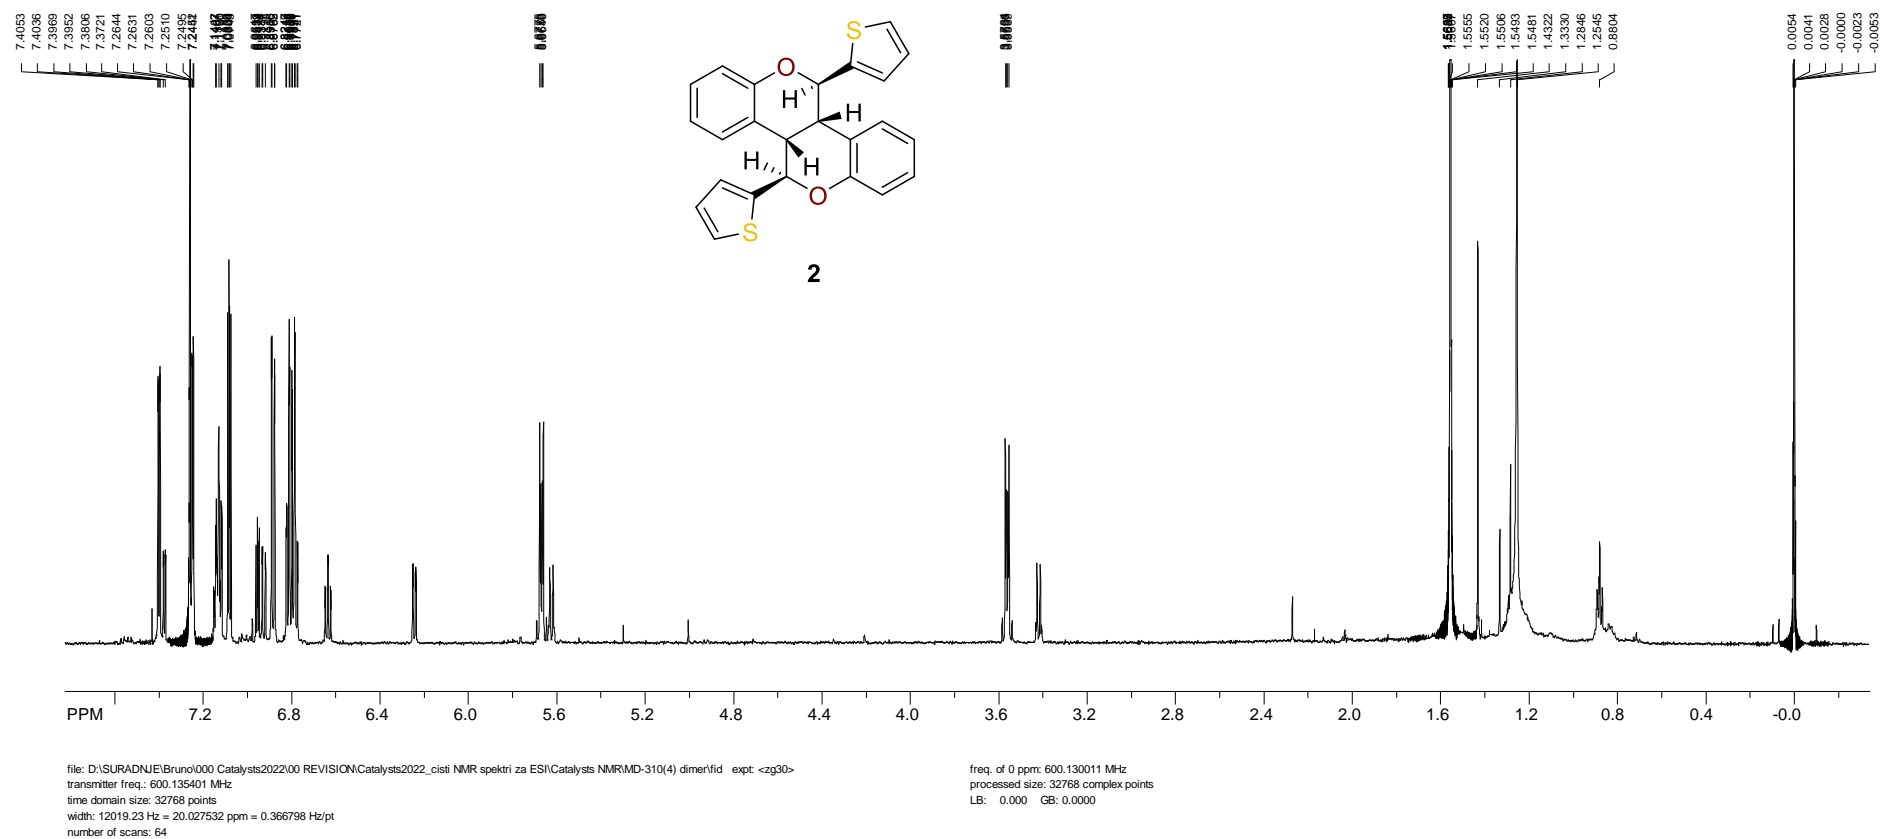

**Figure S7.** <sup>1</sup>H NMR spectrum (CDCl<sub>3</sub>) of (4b*S*,5*R*,10b*S*,11*R*)-5,11-di(thiophen-2-yl)-4b,5,10b,11-tetrahydrochromeno[4,3-*c*]chromene (2).



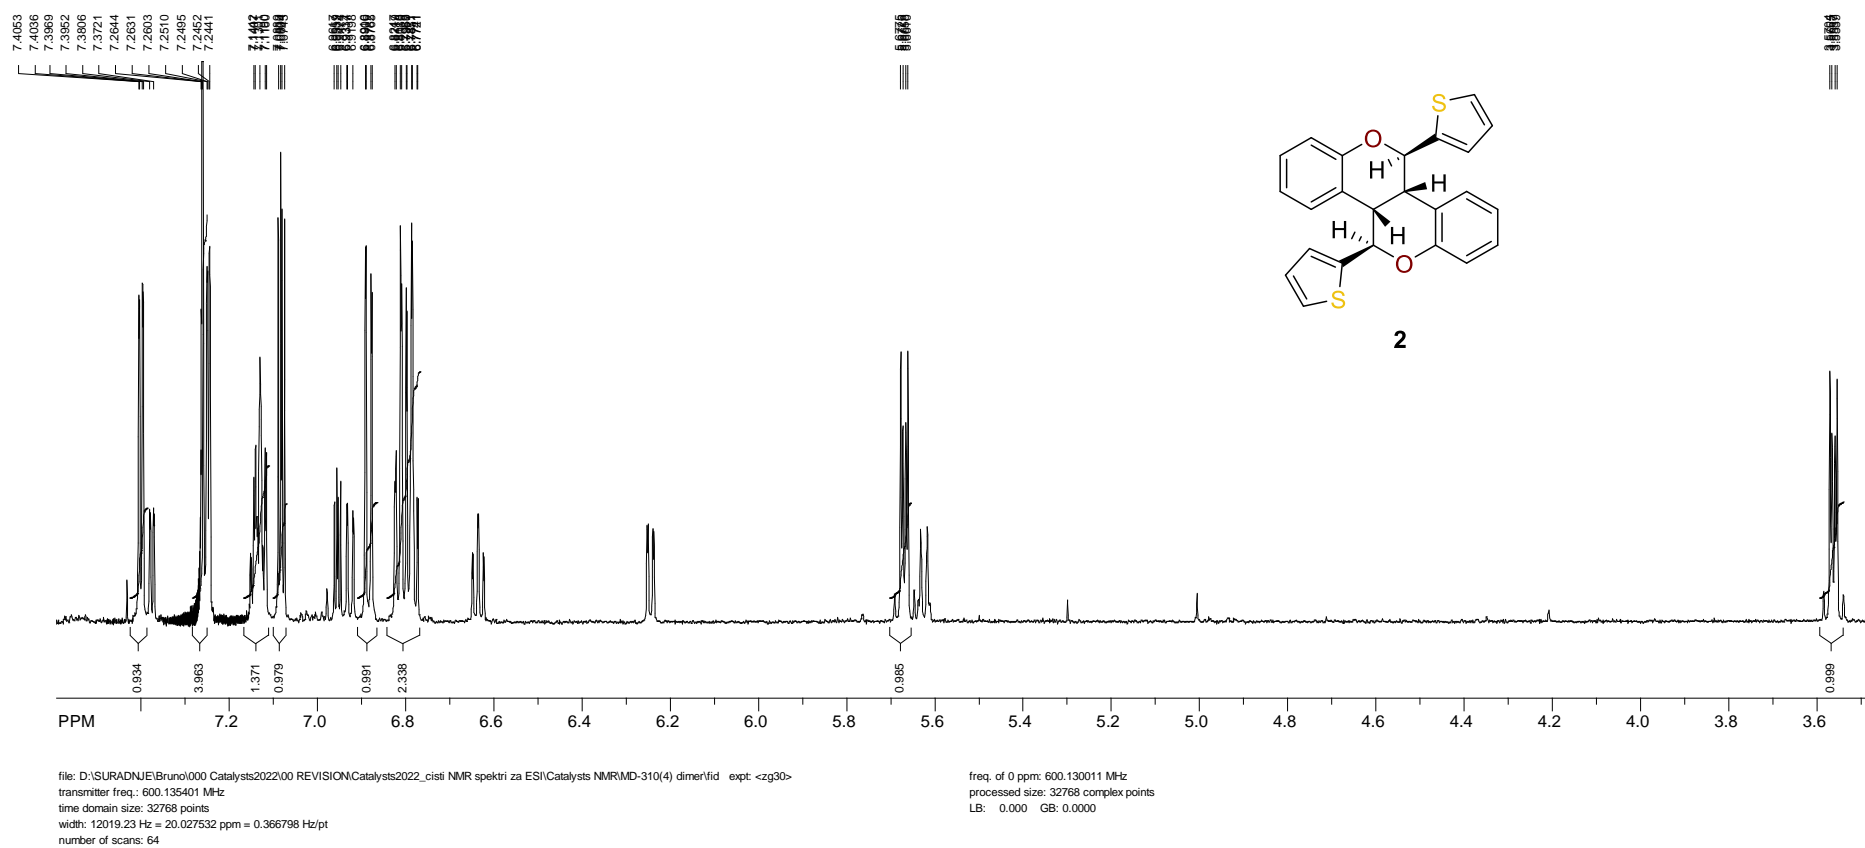

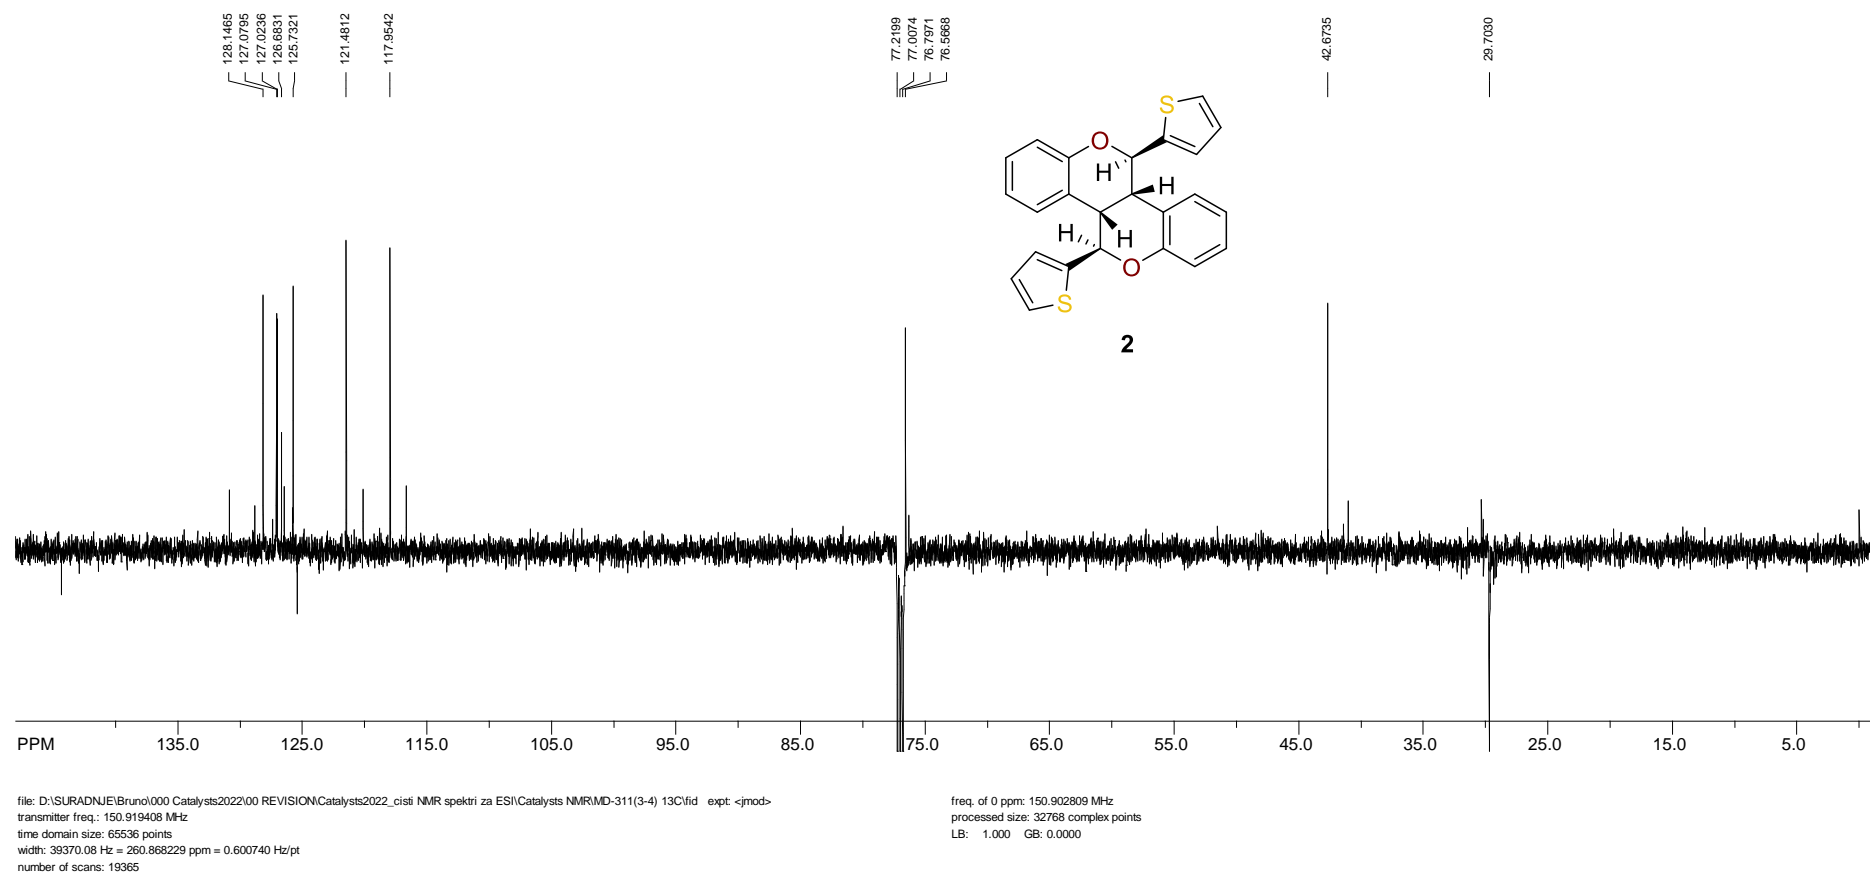

**Figure S9.** <sup>13</sup>C NMR spectrum (CDCl<sub>3</sub>) of (4*b**S*,5*R*,10*b**S*,11*R*)-5,11-di(thiophen-2-yl)-4*b*,5,10*b*,11-tetrahydrochromeno[4,3-*c*]chromene (**2**).

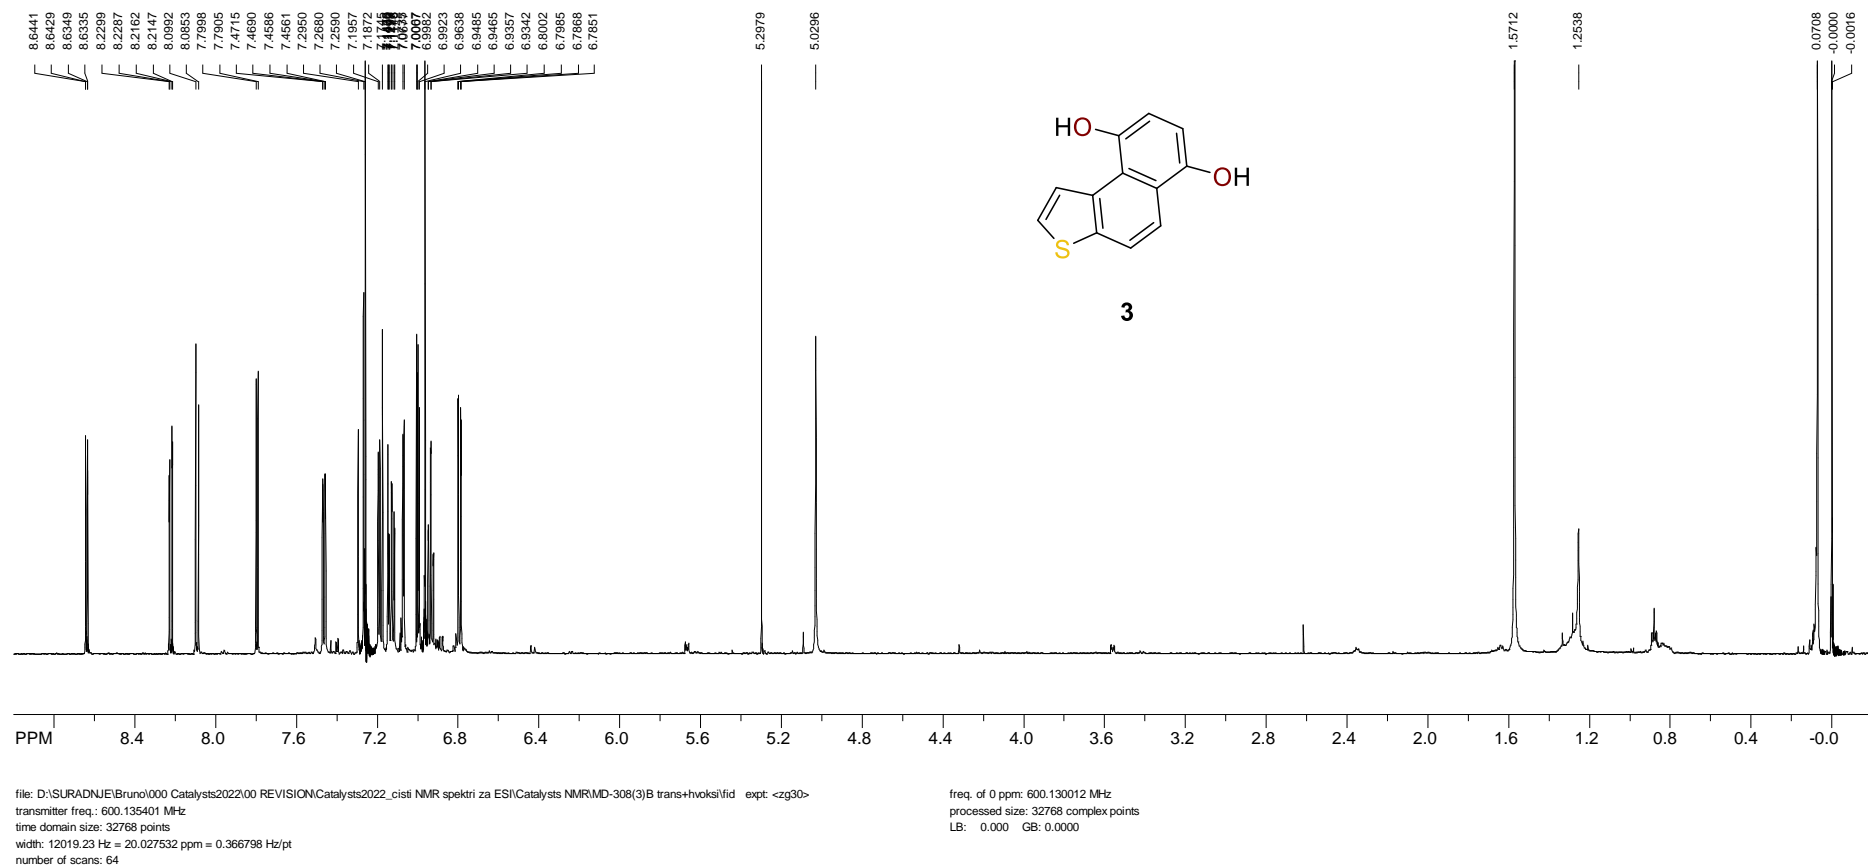

**Figure S10.** <sup>1</sup>H NMR spectrum (CDCl<sub>3</sub>) of naphtho[2,1-*b*]thiophene-6,9-diol (**3**) in the mixture with *trans*-**1**.

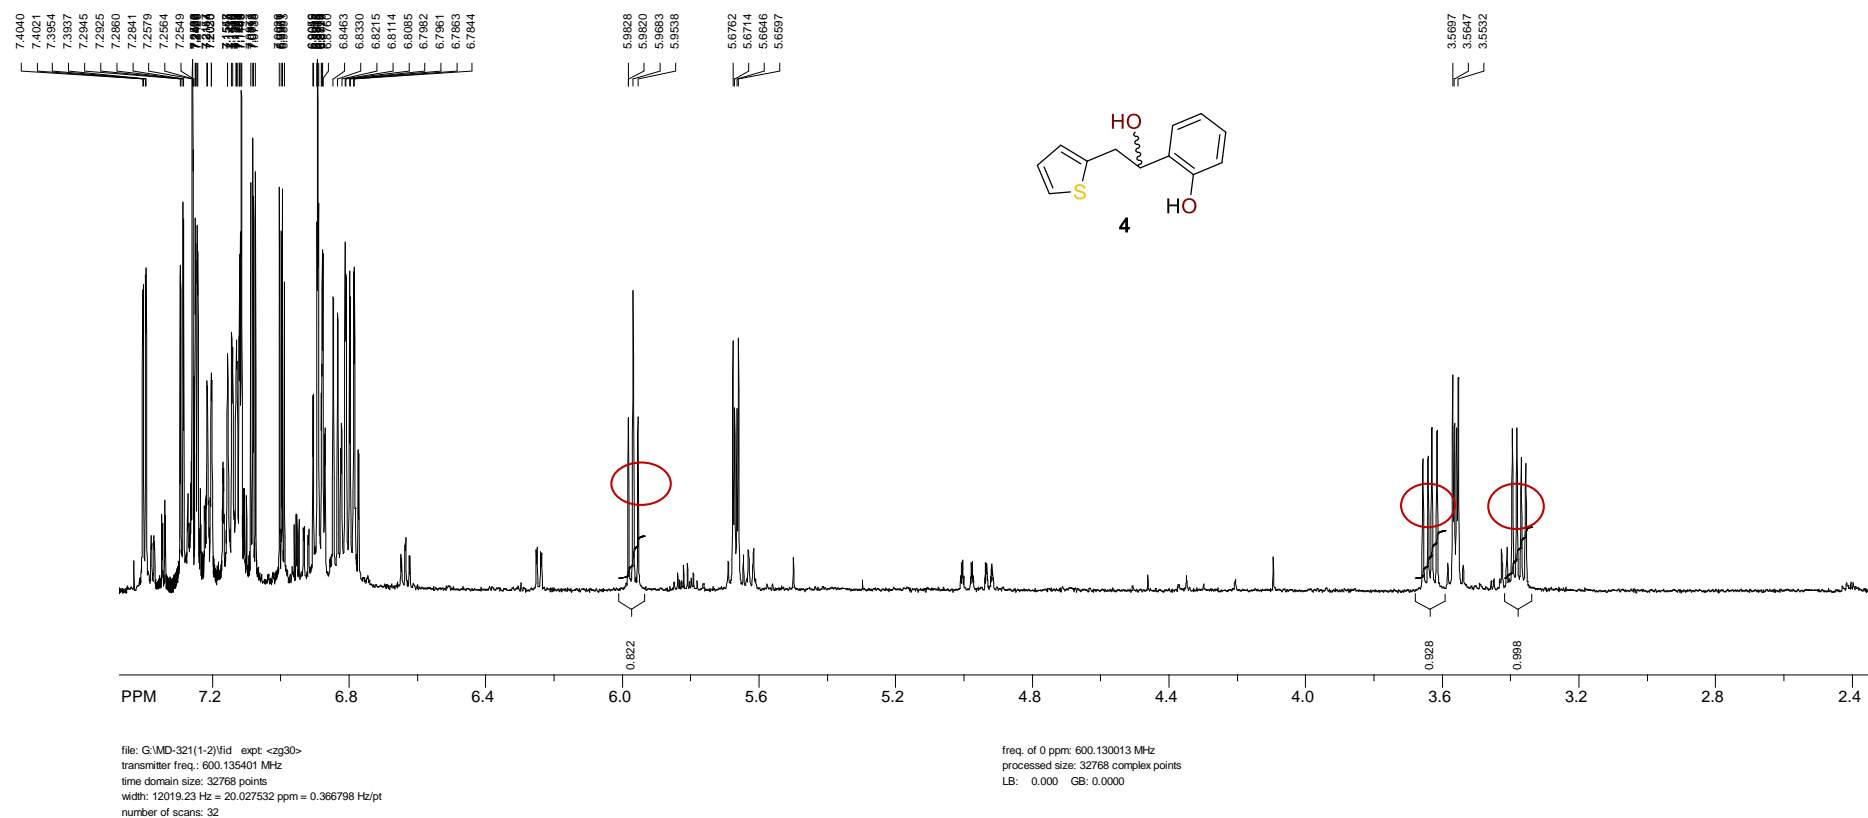

**FigureS11.** <sup>1</sup>H NMR spectrum (CDCl<sub>3</sub>) of the mixture of **2** and **4**.



## 2. Chromatograms, MS spectra and HRMS analyses of the detected compounds *cis*-1 and 2-4

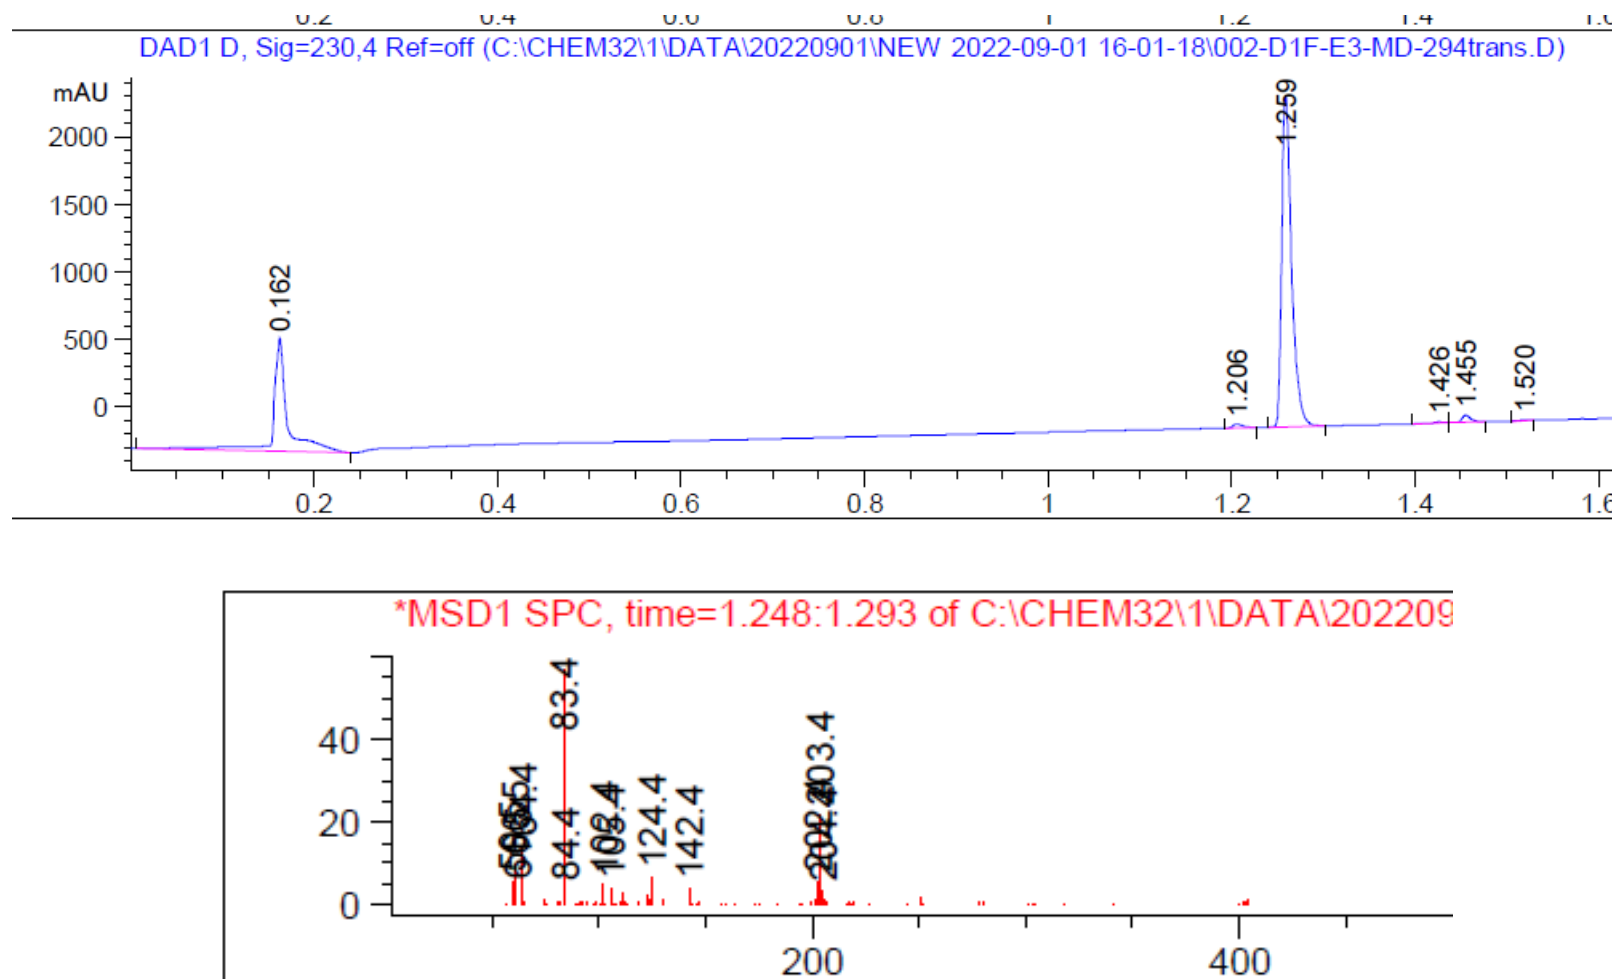

Figure S12. Chromatogram and MS spectrum of *trans*-1.



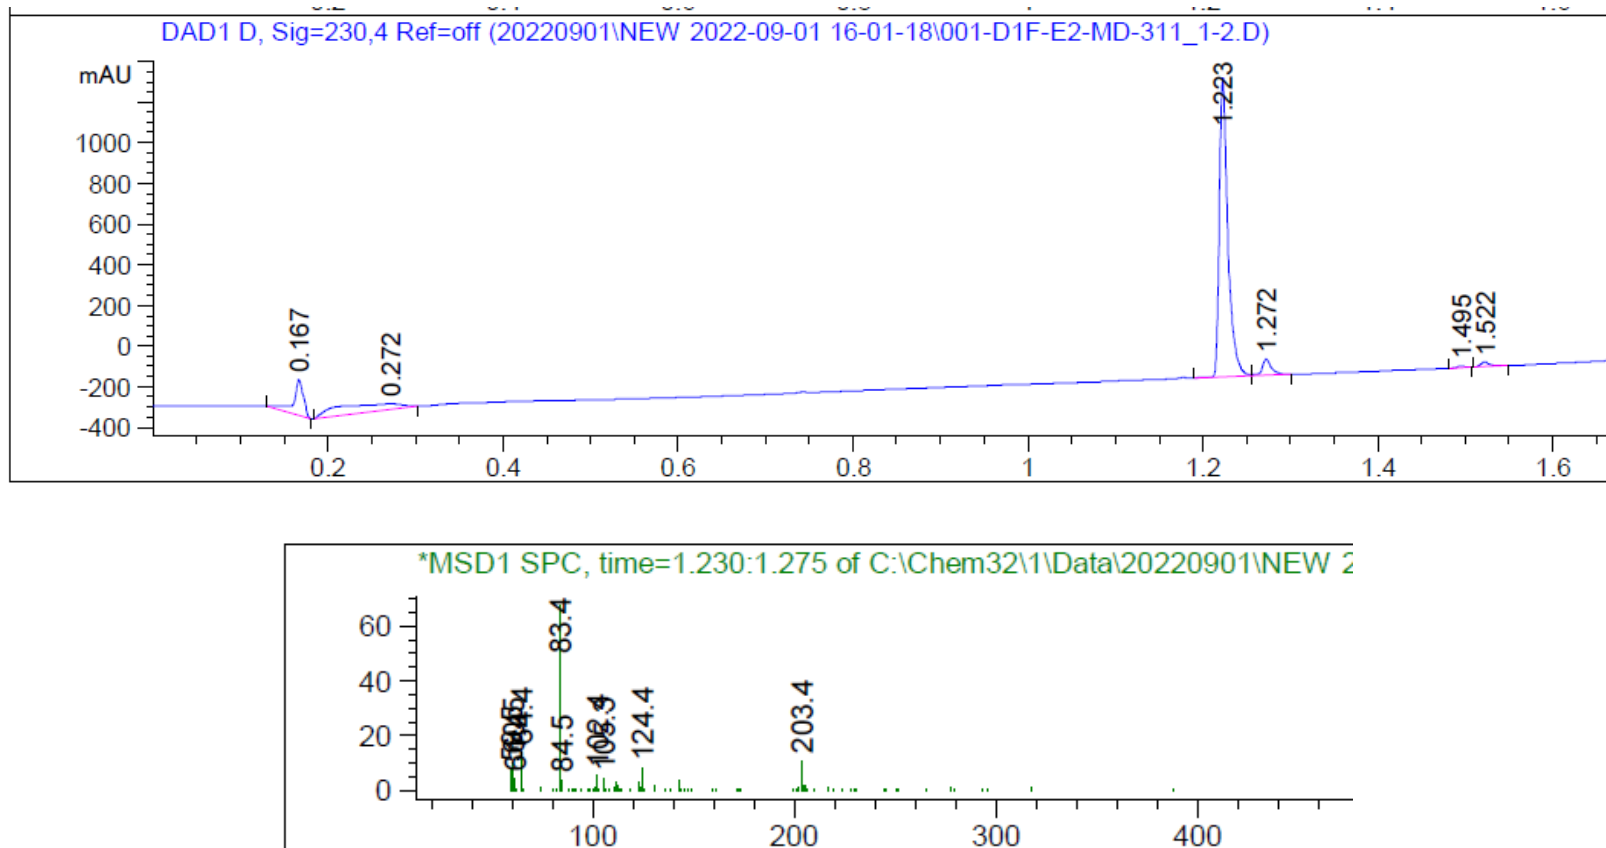

**Figure S13.** Chromatogram of the mixture of *trans*-1 and *cis*-1 and the MS spectrum of *cis*-1.

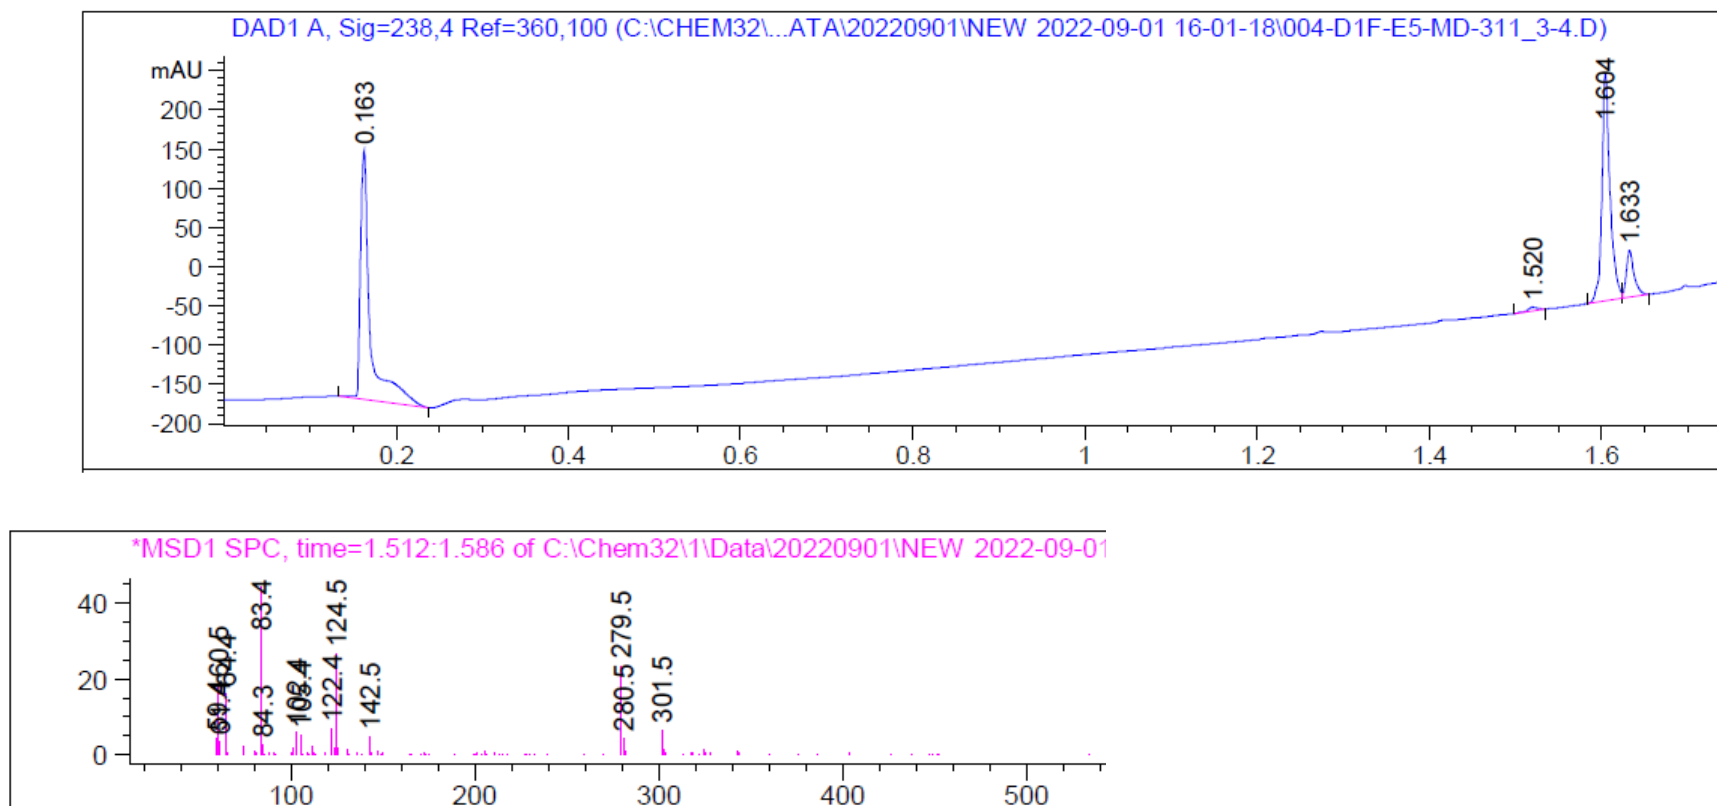

**Figure S14.** Chromatogram and MS spectrum of dimer 2.

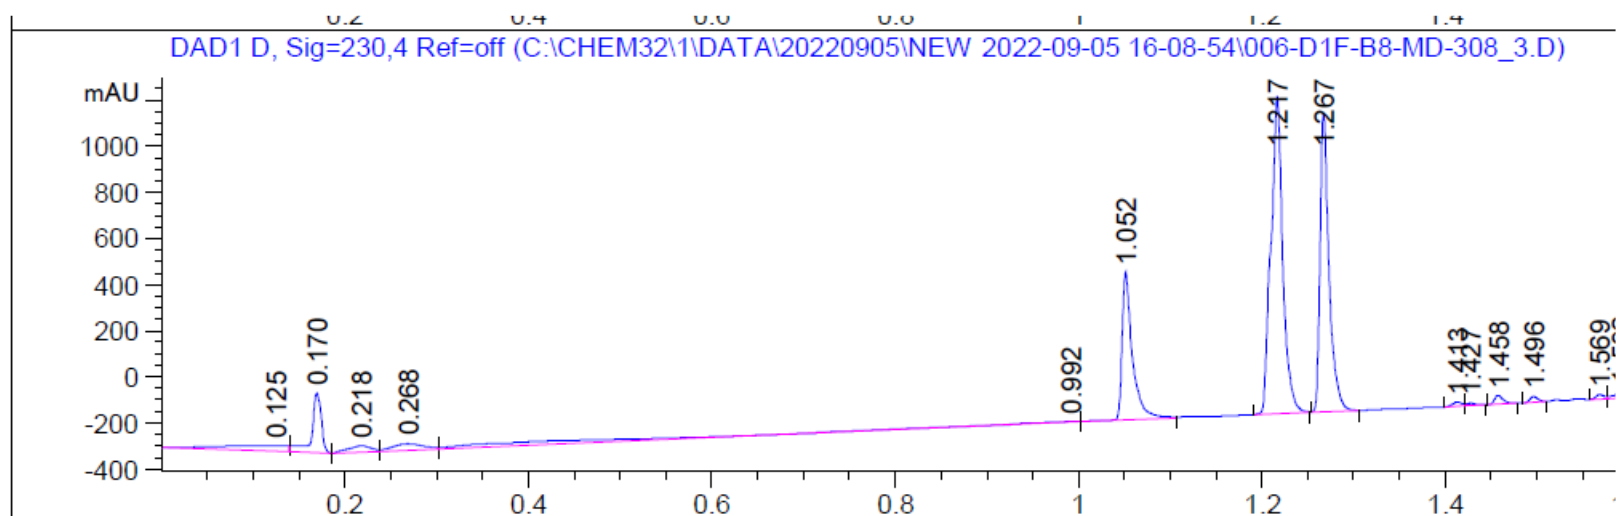

#### Formula Calculator Results

| Formula     | Best | Mass      | Tgt Mass | Diff (ppm) | Ion Species | Score |
|-------------|------|-----------|----------|------------|-------------|-------|
| C12 H8 O2 S | True | 216.02426 | 216.0245 | 1.13       | C12 H7 O2 S | 77.88 |

**Figure S15.** Chromatogram (1.052') and HRMS analysis of oxygenated electrocyclization product **3**.
